## CORRECTION

## Correction: Ten simple rules to colorize biological data visualization

Georges Hattab, Theresa-Marie Rhyne, Dominik Heider

In Fig 1, the Monochromatic harmony appears twice, so the depiction of the Analogous harmony on the color wheel is erroneous. The authors have provided a corrected version here.

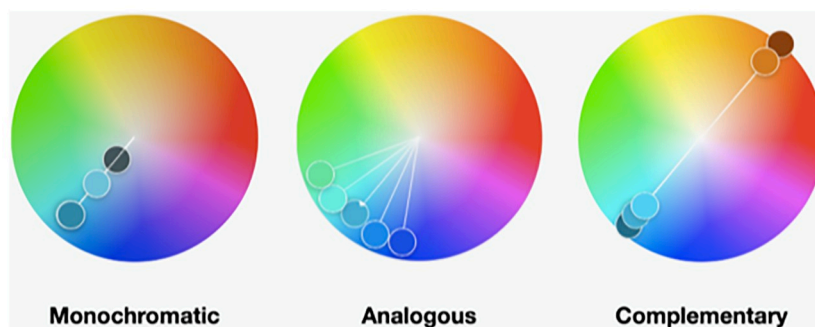

**Fig 1. Example of 3 color harmonies in the key of cyan.** These harmonies were created using the Adobe Color web tool ([color.adobe.com](https://color.adobe.com)). They are color blind friendly palettes and are presented in Web Hex format. Monochromatic: 2C7C9D, 65BFDA, 39484C. Analogous: 5FE896, 5FF3E3, 3CA7D2, 1E78EF, 1938E3. Complementary: 22607C, 3CA6D0, 4CCFFA, D06D21, 7B3514.

<https://doi.org/10.1371/journal.pcbi.1008901.g001>

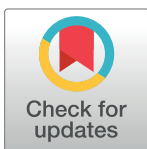

## Reference

1. Hattab G, Rhyne T-M, Heider D (2020) Ten simple rules to colorize biological data visualization. *PLoS Comput Biol* 16(10): e1008259. <https://doi.org/10.1371/journal.pcbi.1008259> PMID: 33057327

## OPEN ACCESS

**Citation:** Hattab G, Rhyne T-M, Heider D (2021) Correction: Ten simple rules to colorize biological data visualization. *PLoS Comput Biol* 17(4): e1008901. <https://doi.org/10.1371/journal.pcbi.1008901>

**Published:** April 6, 2021

**Copyright:** © 2021 Hattab et al. This is an open access article distributed under the terms of the [Creative Commons Attribution License](https://creativecommons.org/licenses/by/4.0/), which permits unrestricted use, distribution, and reproduction in any medium, provided the original author and source are credited.
